# Supplementary material for: Rapid and substrate-independent layer-by-layer fabrication of antireflection- and antifogging-integrated coatings
Source: Royal Society of Chemistry journal article supplement (doi:10.1039/c0jm00792g), 2010-01-01
Supplement: c0jm00792g.pdf [file c0jm00792g.pdf]

## Supporting Materials

### A Rapid and Substrate-Independent Layer-by-Layer Process for the Fabrication of Antireflection and Antifogging Coatings

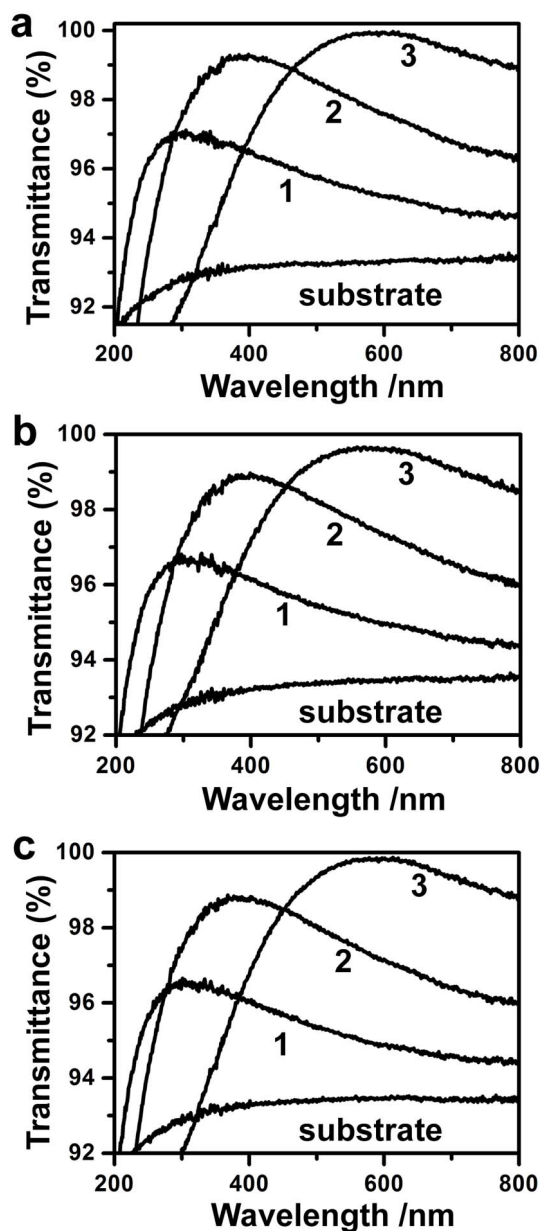

Fig. S1 UV-vis transmission spectra of LbL assembled MSiO<sub>2</sub>/PDDA coatings on quartz substrates fabricated with different dipping times: (a) 5 min, (b) 10 min, (c) 20 min.

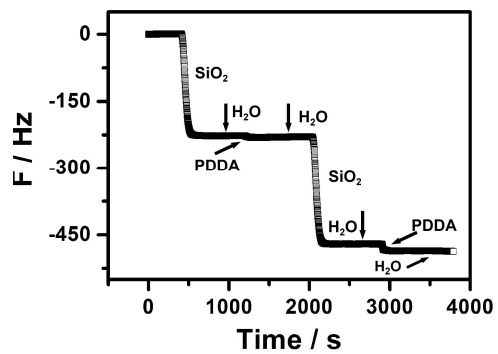

Fig. S2 *In situ* QCM measurements of alternate deposition of SiO<sub>2</sub> nanoparticles and PDDA.
